# Supplementary material for: Zwitterion–neutral form equilibria and binding selectivity of pyridineboronic acids
Source: Royal Society of Chemistry journal article supplement (doi:10.1039/d3ob01211e), 2023-01-01
Supplement: d3ob01211e1.pdf [file d3ob01211e1.pdf]

## Tautomeric equilibria and binding selectivity of pyridineboronic acids

Luis Ramón Ortega-Valdovinos, José Guadalupe Chino-Cruz and Anatoly K. Yatsimirsky\*

Facultad de Química, Universidad Nacional Autónoma de México, 04510 México D. F, México.

E-mail: iatsimirski46@comunidad.unam.mx

### Supporting Information

#### S1. Synthesis of (N-Methyl)-3-pyridiniumboronic acid mesylate (3-(NMe)Py<sup>+</sup>BA).

Synthesis of 3-(NMe)Py<sup>+</sup>BA was performed by procedure described in the literature <sup>1</sup> with minor modifications. 3-Pyridineboronic acid (50 mg, 0.407 mmole) and methyl mesylate (130 mg, 1.15 mmole) were dissolved in dry nitromethane (15 mL). Solution was heated at 73°C for 3 days. The cooled solution was extracted with water (2 x 15 mL). Combined aqueous extracts were washed with diisopropyl ether (3 x 10 mL) and water was evaporated to yield a pale yellow solid (0.81 g, 79.2%)

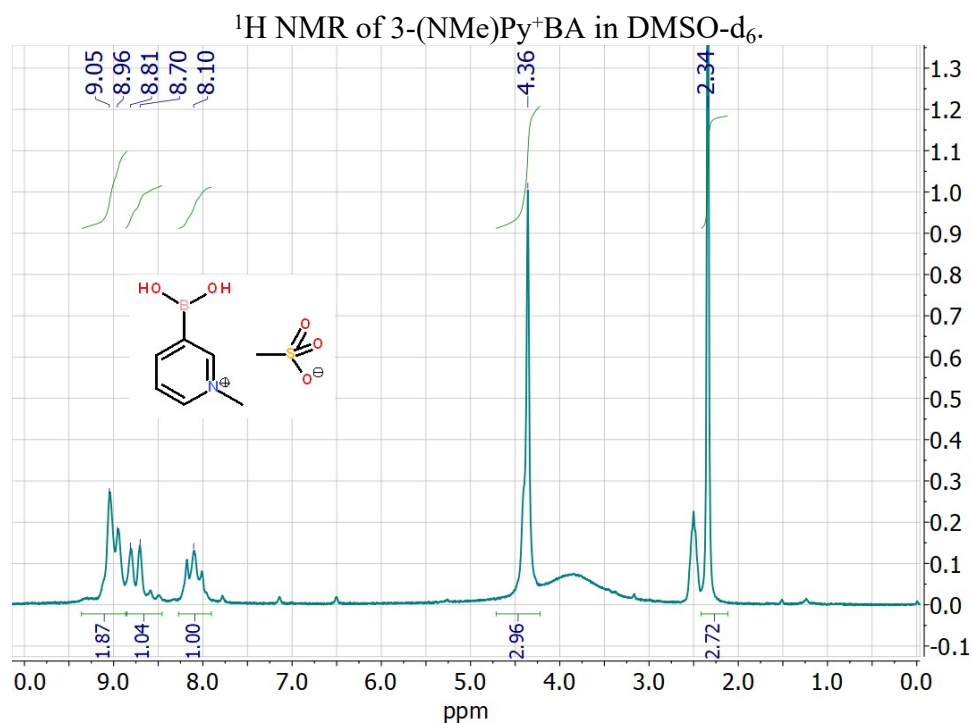

**Table S1.** Results of potentiometric titrations of pyridineboronic acids alone and in the presence of added diols in water (0.1 M NaCl, 25°C). Numbers in parenthesis are standard deviations in the last significant digit.

| boronic acid, M                   | diol, M             | $pK_{a1}$  | $pK_{a2}$  | $\log\beta_{110}$ | $\log\beta_{11-1}$ |
|-----------------------------------|---------------------|------------|------------|-------------------|--------------------|
| 3-PyBA, 0.0054                    | none                | 4.34(0.02) | 8.19(0.02) |                   |                    |
| 3-PyBA, 0.0055                    | fructose, 0.052     |            |            | 2.78(0.03)        | -4.59(0.03)        |
| 3-PyBA, 0.0050                    | sialic acid, 0.0065 |            |            | 5.60(0.03)        | -0.9(0.1)          |
| 3-PyBA, 0.0053                    | lactic acid, 0.0053 |            |            | 5.10(0.04)        | -1.47(0.08)        |
| 3-PyBA, 0.0055                    | glucose, 0.20       |            |            | 1.72(0.02)        | -5.95(0.03)        |
| 3-PyBA, 0.0055                    | catechol, 0.0107    |            |            | 3.35(0.03)        | -3.72(0.04)        |
| 4-PyBA, 0.0075                    | none                | 3.85(0.02) | 7.83(0.02) |                   |                    |
| 4-PyBA, 0.0085                    | fructose, 0.050     |            |            | 2.92(0.04)        | -4.16(0.05)        |
| 4-PyBA, 0.0063                    | sialic acid, 0.0075 |            |            | 5.76(0.02)        | -0.47(0.04)        |
| 3-(NMe)Py <sup>+</sup> BA, 0.0039 | none                | 4.36(0.02) |            |                   |                    |
| 3-(NMe)Py <sup>+</sup> BA, 0.0039 | sialic acid, 0.0054 |            |            |                   | 1.17(0.02)         |

**Table S2.** Results of potentiometric titrations of pyridineboronic acids alone and in the presence of added diol in 50% vol. aqueous organic solvents (0.1 M NaCl, 25°C). Numbers in parenthesis are standard deviations in the last significant digit.

| co-solvent | boronic acid, M | diol, M             | $pK_{a1}$  | $pK_{a2}$  | $\log\beta_{110}$ | $\log\beta_{11-1}$ |
|------------|-----------------|---------------------|------------|------------|-------------------|--------------------|
| dioxane    | 3-PyBA, 0.0050  | none                | 4.40(0.03) | 9.20(0.03) |                   |                    |
|            | none            | sialic acid, 0.0074 | 3.53(0.05) |            |                   |                    |
|            | 3-PyBA, 0.0056  | fructose, 0.049     |            |            | 2.32(0.03)        | -4.97(0.03)        |
|            | 3-PyBA, 0.0052  | sialic acid, 0.0074 |            |            | 5.45(0.06)        | -2.2(0.2)          |
| MeOH       | 3-PyBA, 0.0042  | none                | 4.44(0.02) | 8.08(0.02) |                   |                    |
|            | 3-PyBA, 0.0042  | fructose            |            |            | 2.54              | -4.82              |
| EtOH       | 3-PyBA, 0.0065  | none                | 4.48(0.02) | 8.97(0.01) |                   |                    |
|            | 3-PyBA, 0.0062  | fructose, 0.050     |            |            | 2.52(0.02)        | -4.81(0.02)        |
| MeCN       | 3-PyBA, 0.0058  | none                | 4.32(0.07) | 7.72(0.07) |                   |                    |
|            | 3-PyBA, 0.0051  | fructose, 0.050     |            |            | 2.37(0.04)        | -4.91(0.04)        |
| DMSO       | 3-PyBA, 0.0051  | none                | 4.73(0.04) | 9.42(0.05) |                   |                    |
|            | 3-PyBA, 0.0049  | fructose, 0.051     |            |            | 2.16(0.03)        | -5.26(0.04)        |
| dioxane    | 4-PyBA, 0.0065  | none                | 4.20(0.02) | 8.64(0.02) |                   |                    |
|            | 4-PyBA, 0.0068  | fructose, 0.050     |            |            | 2.61(0.03)        | -4.51(0.03)        |
|            | 4-PyBA, 0.0046  | sialic acid, 0.0074 |            |            | 5.57(0.05)        | -1.08(0.06)        |

**Table S3.** Results of potentiometric titrations of substituted phenylboronic acids (**X**-C<sub>6</sub>H<sub>4</sub>B(OH)<sub>2</sub>) alone and in the presence of added fructose in 50% vol. aqueous dioxane (0.1 M NaCl, 25°C). Numbers in parenthesis are standard deviations in the last significant digit.

| <b>X, M</b>                     | [fructose], <b>M</b> | <b>pK<sub>a</sub></b> | <b>logβ<sub>11-1</sub></b> | <b>logK<sub>tet</sub></b> |
|---------------------------------|----------------------|-----------------------|----------------------------|---------------------------|
| <b>H, 0.013</b>                 | none                 | 11.18(0.01)           |                            |                           |
| <b>H, 0.013</b>                 | 0.055                |                       | -6.37(0.01)                | 4.81                      |
| <b>3-Cl, 0.0064</b>             | none                 | 10.20(0.01)           |                            |                           |
| <b>3-Cl, 0.0064</b>             | 0.050                |                       | -5.69(0.01)                | 4.51                      |
| <b>3-CF<sub>3</sub>, 0.0057</b> | none                 | 10.20(0.02)           |                            |                           |
| <b>3-CF<sub>3</sub>, 0.0057</b> | 0.050                |                       | -5.68(0.01)                | 4.52                      |
| <b>3-NO<sub>2</sub>, 0.0068</b> | none                 | 9.13(0.02)            |                            |                           |
| <b>3-NO<sub>2</sub>, 0.0068</b> | 0.055                |                       | -4.83(0.01)                | 4.30                      |

## S2. Spectrophotometric titrations of substituted phenylboronic acids by sialic acid

Titration were performed at pH 5.5 when all boronic acids used in titration experiments are present in solution as neutral species. The observed binding constants determined under these conditions correspond to  $K'_{tet}$  values.

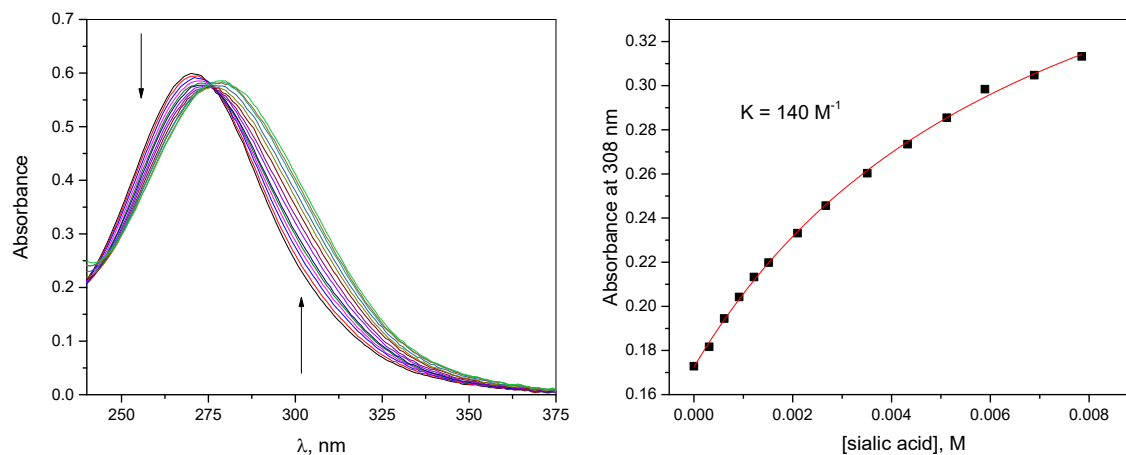

**Fig. S1.** Spectrophotometric titration of 0.066 mM 4-nitrophenylboronic acid by sialic acid at pH 5.5. Arrows show directions of spectral changes at increased concentration of sialic acid.

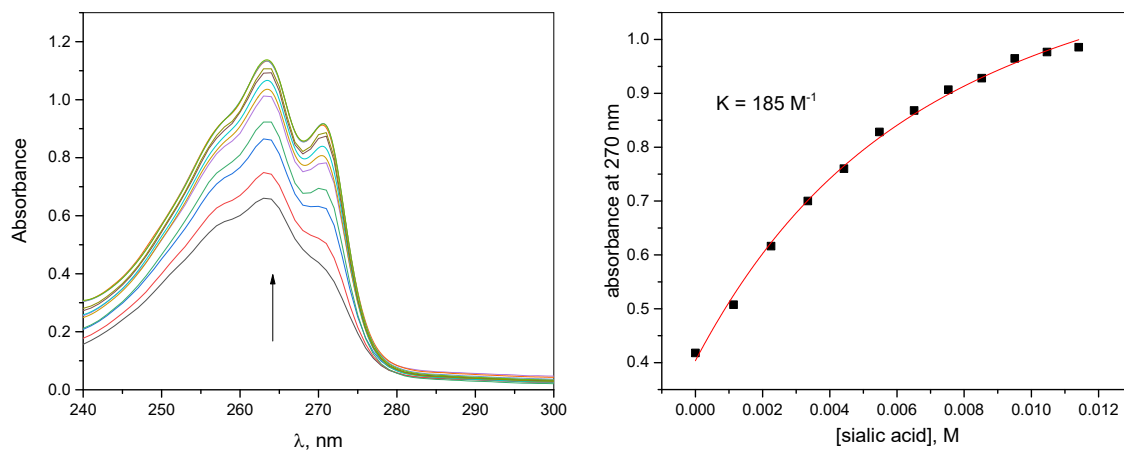

**Fig. S2.** Spectrophotometric titration of 2.4 mM 3,5-bis(trifluoromethyl)phenylboronic acid by sialic acid at pH 5.5. Arrow shows the direction of spectral changes at increased concentration of sialic acid.

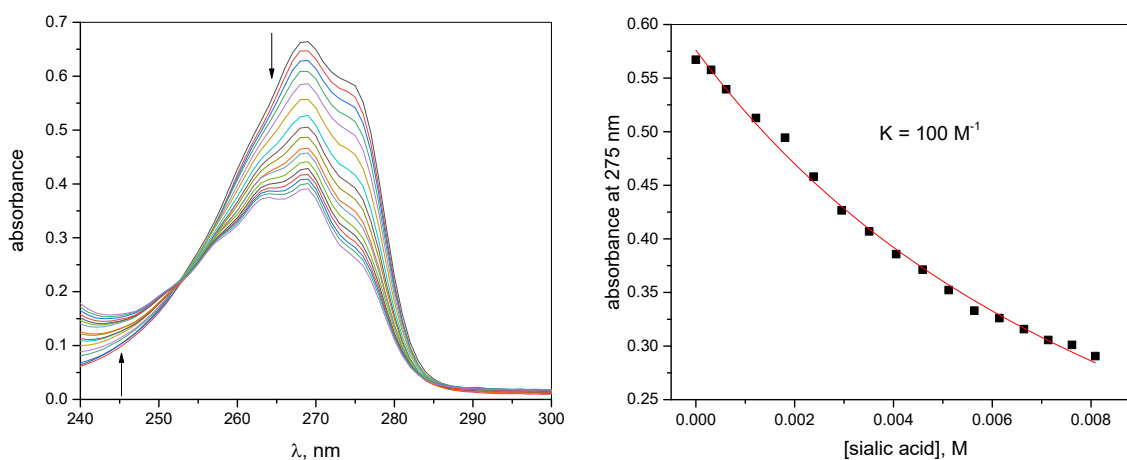

**Fig. S3.** Spectrophotometric titration of 0.7 mM 4-(trifluoromethyl)phenylboronic acid by sialic acid at pH 5.5. Arrows show directions of spectral changes at increased concentration of sialic acid.

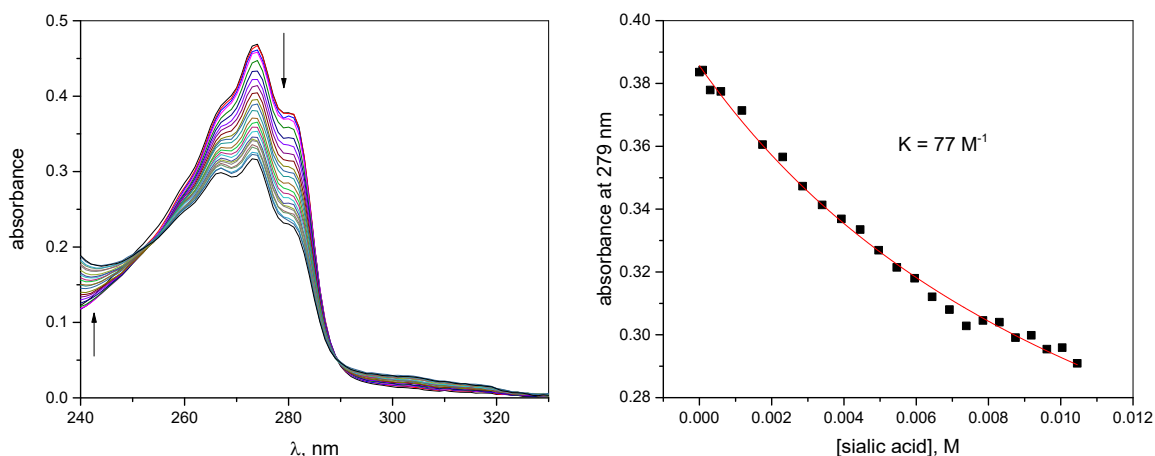

**Fig. S4.** Spectrophotometric titration of 0.78 mM 4-chlorophenylboronic acid by sialic acid at pH 5.5. Arrows show directions of spectral changes at increased concentration of sialic acid.

**Table S4.** Observed stability constants of sialic acid complexes with substituted phenylboronic acids obtained by fitting results shown in Figures S1-S4.

| substituent                         | $\sigma$ | $\text{p}K_a^{\text{B}}$ | $\log K_{\text{obs}}$ |
|-------------------------------------|----------|--------------------------|-----------------------|
| 4-NO <sub>2</sub>                   | 0.78     | 7.1                      | 2.20±0.01             |
| 3,5-(CF <sub>3</sub> ) <sub>2</sub> | 0.86     | 7.2                      | 2.27±0.06             |
| 4-CF <sub>3</sub>                   | 0.54     | 7.39                     | 2.00±0.06             |
| 3-Cl                                | 0.37     | 7.85                     | 1.88±0.02             |

### S3. Observed stability constants of boronate esters at variable pH.

The observed equilibrium constant  $K_{\text{obs}}$  for ester formation between a boronic acid  $\text{RB(OH)}_2$  and a diol  $\text{D(OH)}_2$  is given by equation (S1).<sup>2</sup>

$$K_{\text{obs}} = \beta_{11-1}[\text{H}^+]/\{(K_a^{\text{D}} + [\text{H}^+])(K_a^{\text{B}} + [\text{H}^+])\} \quad (\text{S1})$$

Considering that  $\beta_{11-1} = K_{\text{tet}}K_a^{\text{B}} = K'_{\text{tet}}K_a^{\text{D}}$  one obtains expressions (S2) and (S3).

$$K_{\text{obs}} = K_{\text{tet}}K_a^{\text{B}}[\text{H}^+]/\{(K_a^{\text{D}} + [\text{H}^+])(K_a^{\text{B}} + [\text{H}^+])\} \quad (\text{S2})$$

$$K_{\text{obs}} = K'_{\text{tet}}K_a^{\text{D}}[\text{H}^+]/\{(K_a^{\text{D}} + [\text{H}^+])(K_a^{\text{B}} + [\text{H}^+])\} \quad (\text{S3})$$

Here  $K_a^{\text{B}}$  and  $K_a^{\text{D}}$  are the acid dissociation constants of boronic acid and diol respectively and  $K_{\text{tet}}$  is the stability constant of the tetrahedral complex formed through reaction (S4).

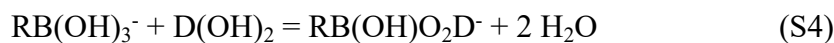

Alternatively, the tetrahedral complex can be formed through reaction (S5) with the respective stability constant  $K'_{\text{tet}}$ .

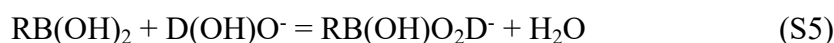

Stability constants  $K_{\text{tet}}$  and  $K'_{\text{tet}}$  are mutually related through equation (S6).

$$K_{\text{tet}} = K'_{\text{tet}} K_{\text{a}}^{\text{D}} / K_{\text{a}}^{\text{B}} \quad (\text{S6})$$

Equations (S1) - (S3) are used in calculation of profiles shown in Fig. 12. They predict a bell-shaped profile of  $K_{\text{obs}}$  vs pH for any combination of boronic acid and diol with a maximum value of  $K_{\text{obs}}$  at the optimum pH given by equation (S7).

$$\text{pH}_{\text{opt}} = (\text{p}K_{\text{a}}^{\text{B}} + \text{p}K_{\text{a}}^{\text{D}}) / 2 \quad (\text{S7})$$

All three equations (S1) - (S3) are identical but use different expressions for the cumulative constant  $\beta_{11-1}$ . Introducing in any of them, for instance in (S3) the expression for  $[\text{H}^+]_{\text{opt}} = (K_{\text{a}}^{\text{B}} K_{\text{a}}^{\text{D}})^{0.5}$  following from eqn (S7) one obtains for the maximum value of  $K_{\text{obs}}$  the equation (S8).

$$K_{\text{obs}}^{\text{MAX}} = K'_{\text{tet}} / (1 + (K_{\text{a}}^{\text{B}} / K_{\text{a}}^{\text{D}})^{0.5})^2 \quad (\text{S8})$$

If  $K_{\text{a}}^{\text{D}} \gg K_{\text{a}}^{\text{B}}$  (the case of sialic acid) one obtains from (S8)  $K_{\text{obs}}^{\text{MAX}} = K'_{\text{tet}}$ , but if  $K_{\text{a}}^{\text{B}} \gg K_{\text{a}}^{\text{D}}$  (the case of fructose) one obtains  $K_{\text{obs}}^{\text{MAX}} = K'_{\text{tet}} K_{\text{a}}^{\text{D}} / K_{\text{a}}^{\text{B}} = K_{\text{tet}}$  (see Fig. 12).

For sialic acid  $K_{\text{a}}^{\text{D}} = 2.5 \times 10^{-3}$  M. Therefore, in the pH range from 5 to 7 the condition  $K_{\text{a}}^{\text{D}} \gg [\text{H}^+]$  is fulfilled and the equation (S3) takes the form of (S9), which coincides with equation (22) in the main text.

$$K_{\text{obs}} = K'_{\text{tet}} [\text{H}^+] / (K_{\text{a}}^{\text{B}} + [\text{H}^+]) = K'_{\text{tet}} / (1 + K_{\text{a}}^{\text{B}} / [\text{H}^+]) \quad (\text{S9})$$

**Table S5.** Stability constants of sialate complexes with boronic acids at pH 6 (Fig. 13).

| boronic acid | $\text{p}K_{\text{a}}^{\text{B}}$ | $K_{\text{obs}}, \text{M}^{-1}$ | Ref.      |
|--------------|-----------------------------------|---------------------------------|-----------|
| 1            | 4.2                               | 645                             | 3         |
| 2            | 4.2                               | 499                             | 3         |
| 3            | 3.85                              | 356                             | this work |
| 4            | 4.34                              | 252                             | this work |
| 4            | 4.4                               | 182                             | 3         |
| 5            | 4.4                               | 61                              | 3         |
| 6            | 4.36                              | 132                             | this work |
| 7            | 6.2                               | 490                             | 3         |
| 8            | 6.3                               | 419                             | 3         |
| 9            | 6.65                              | 358                             | 3         |
| 10           | 7.2                               | 175                             | this work |
| 11           | 7.1                               | 147                             | this work |
| 12           | 7.39                              | 96                              | this work |
| 13           | 7.85                              | 75                              | this work |
| 14           | 7.99                              | 34                              | 3         |
| 15           | 8.3                               | 40                              | 3         |
| 16           | 8.9                               | 20                              | 4         |
| 17           | 7.3                               | 51.2                            | 5         |

**Table S6.** Stability constants of sialate and fructose complexes with boronic acids at pH 7.4 (Fig. 14) determined by affinity capillary electrophoresis. <sup>6</sup>

| tag      | boronic acid                             | pK <sub>a</sub> <sup>B</sup> | K <sub>obs</sub> , M <sup>-1</sup> |          |
|----------|------------------------------------------|------------------------------|------------------------------------|----------|
|          |                                          |                              | sialic acid                        | fructose |
| <i>a</i> | phenylboronic acid                       | 8.9                          | 16.0                               | 140      |
| <i>b</i> | 3-carboxyphenylboronic acid              | 8.14                         | 35.7                               | 261      |
| <i>c</i> | 4-(methylsulfonyl)benzene-boronic acid   | 7.4                          | 104                                | 1450     |
| <i>d</i> | 2,4-difluoro-3-formylphenyl-boronic acid | 6.74                         | 42.5                               | 2790     |
| <i>e</i> | 2-furanboronic acid                      | 7.88                         | 23.7                               | 372      |
| <i>f</i> | 3-furanboronic acid                      | 8.65                         | 9.2                                | 139      |
| <i>g</i> | 2-thiopheneboronic acid                  | 8.11                         | 24.0                               | 483      |
| <i>h</i> | 3-thiopheneboronic acid                  | 8.77                         | 8.8                                | 169      |
| <i>i</i> | 3-pyridinylboronic acid                  | 4.34                         | 39.4                               | 833      |
| <i>j</i> | 4-pyridinylboronic acid                  | 3.85                         | 35.7                               | 794      |
| <i>k</i> | pyrimidine-5-boronic acid                | 6.2                          | 22.6                               | 1020     |
| <i>l</i> | N-Me-3-pyridinylboronic acid *           | 4.36                         | 5.4                                |          |

\* This work

<sup>1</sup> L. K. Mohler and A. W. Czarnik, *J. Am. Chem. Soc.* 1993, **115**, 2998-2999.

<sup>2</sup> M. A. Martínez-Aguirre, R. Villamil-Ramos, J. A. Guerrero-Alvarez and A. K. Yatsimirsky, *J. Org. Chem.* 2013, **78**, 4674-4684.

<sup>3</sup> A. Matsumoto, A. J. Stephenson-Brown, T. Khan, T. Miyazawa, H. Cabral, K. Kataoka and Y. Miyahara, *Chem. Sci.*, 2017, **8**, 6165–6170.

<sup>4</sup> G. Springsteen and B. Wang, *Tetrahedron* 2002, **58**, 5291-5300

<sup>5</sup> A. Di Pasquale, S. Tommasone, L. Xu, J. Ma, and P. M. Mendes, *J. Org. Chem.* 2020, **85**, 8330–8338.

<sup>6</sup> C. Lü, H. Li, H. Wang and Z. Liu, *Anal. Chem.* 2013, **85**, 2361–2369.
